# Supplementary material for: Heterogeneity in quiescent Müller glia in the uninjured zebrafish retina drive differential responses following photoreceptor ablation
Source: PubMed Central journal article supplement (PMC10413128; doi:10.3389/fnmol.2023.1087136), 2023-07-27
Supplement: Image_1.pdf [file Image_1.pdf]

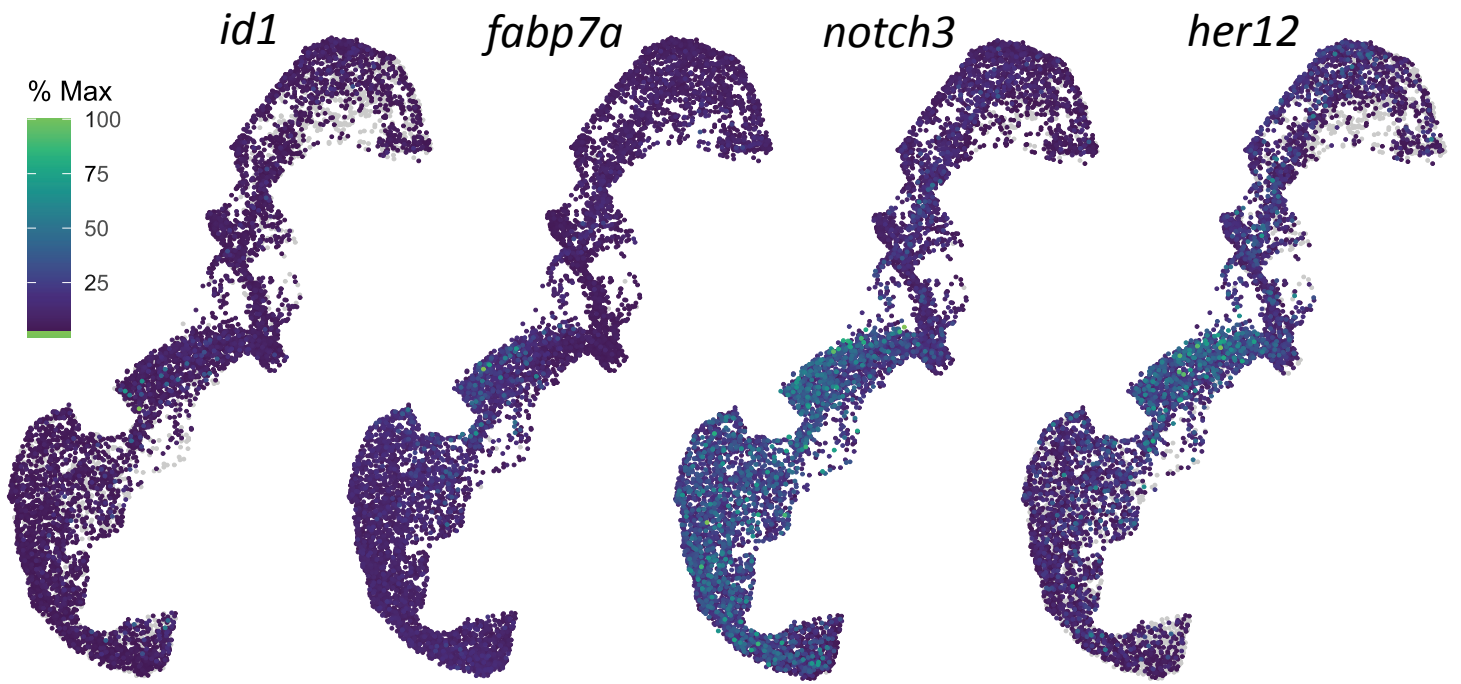

Supplementary Figure 1: *id1*, *fabp7a*, *notch3* and *her12* expression in Müller glia along pseudotime in integrated *Lws2* and *Sws2* photoreceptor ablation scRNA-seq datasets.
