# Supplementary material for: Heterogeneity in quiescent Müller glia in the uninjured zebrafish retina drive differential responses following photoreceptor ablation
Source: PubMed Central journal article supplement (PMC10413128; doi:10.3389/fnmol.2023.1087136), 2023-07-27
Supplement: Image_5.pdf [file Image_5.pdf]

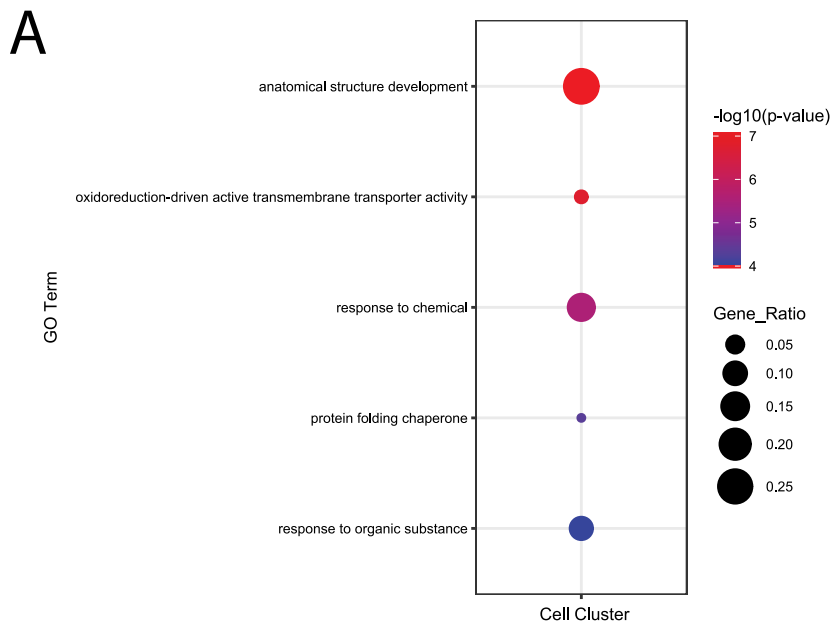

**B**

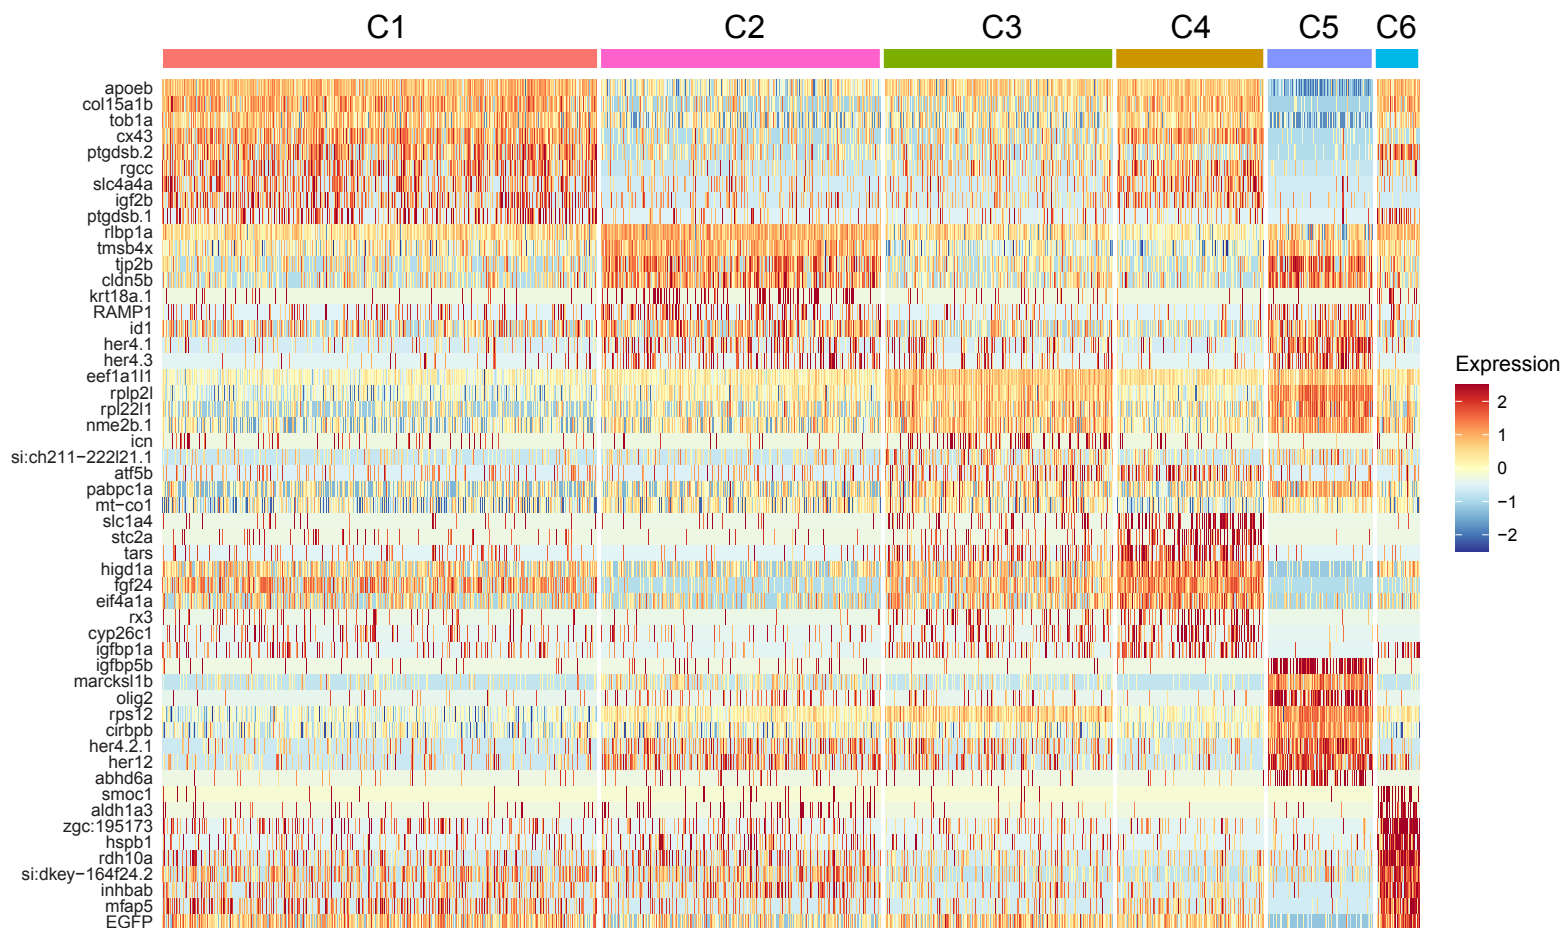

Supplementary Figure 5: (A) Enrichment term analysis of the Müller glia cluster expressing markers associated with stress response. (B) Heatmap visualizing the top 10 expressed genes of each quiescent Müller glia cluster (C1-C6).
