# Supplementary material for: Heterogeneity in quiescent Müller glia in the uninjured zebrafish retina drive differential responses following photoreceptor ablation
Source: PubMed Central journal article supplement (PMC10413128; doi:10.3389/fnmol.2023.1087136), 2023-07-27
Supplement: Image_6.pdf [file Image_6.pdf]

*gfap:EGFP efnb2a fgf24* DAPI

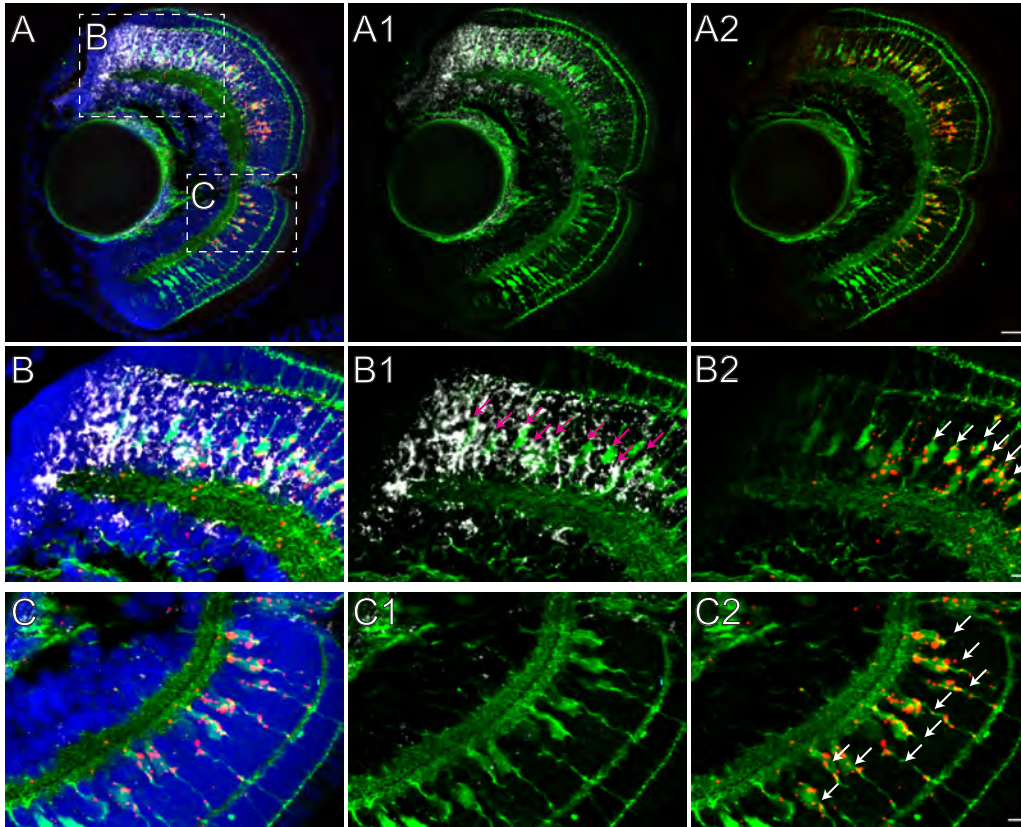

*gfap:EGFP rdh10a fgf24* DAPI

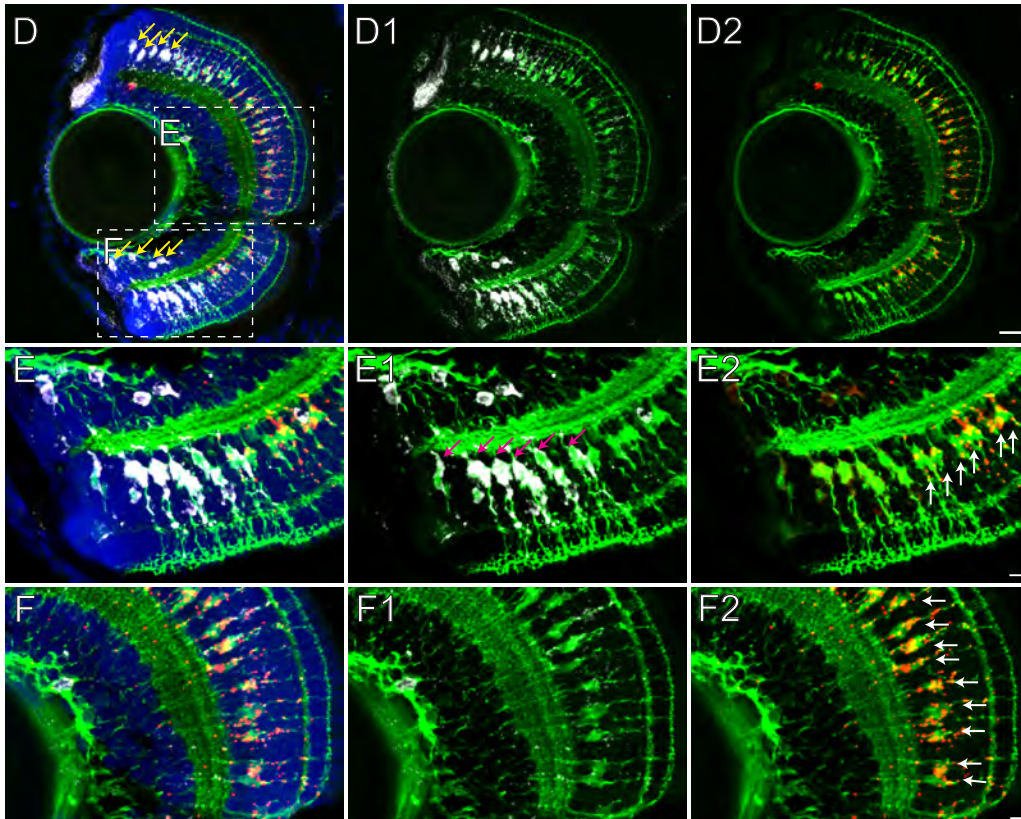

Supplementary Figure 6. (A-F) RNAscope *in situ* hybridization reveals the colocalization of *efnb2a* (magenta arrows in B1) *fgf24* (white arrows in B2, C2, E2 and F2), and *rdh10a* (magenta arrows in E1) with dorsal, central, and ventral *gfap:EGFP*+ Müller glia, respectively. A small subset of Müller glia in the dorsal retina and non-MG in ventral retina (yellow arrows in D) also express *rdh10a* (D-D2). Scale bars A-A2, D-D2 = 20  $\mu$ m; B-C2, E-F2 = 5  $\mu$ m.
