# Supplementary material for: Heterogeneity in quiescent Müller glia in the uninjured zebrafish retina drive differential responses following photoreceptor ablation
Source: PubMed Central journal article supplement (PMC10413128; doi:10.3389/fnmol.2023.1087136), 2023-07-27
Supplement: Image_7.pdf [file Image_7.pdf]

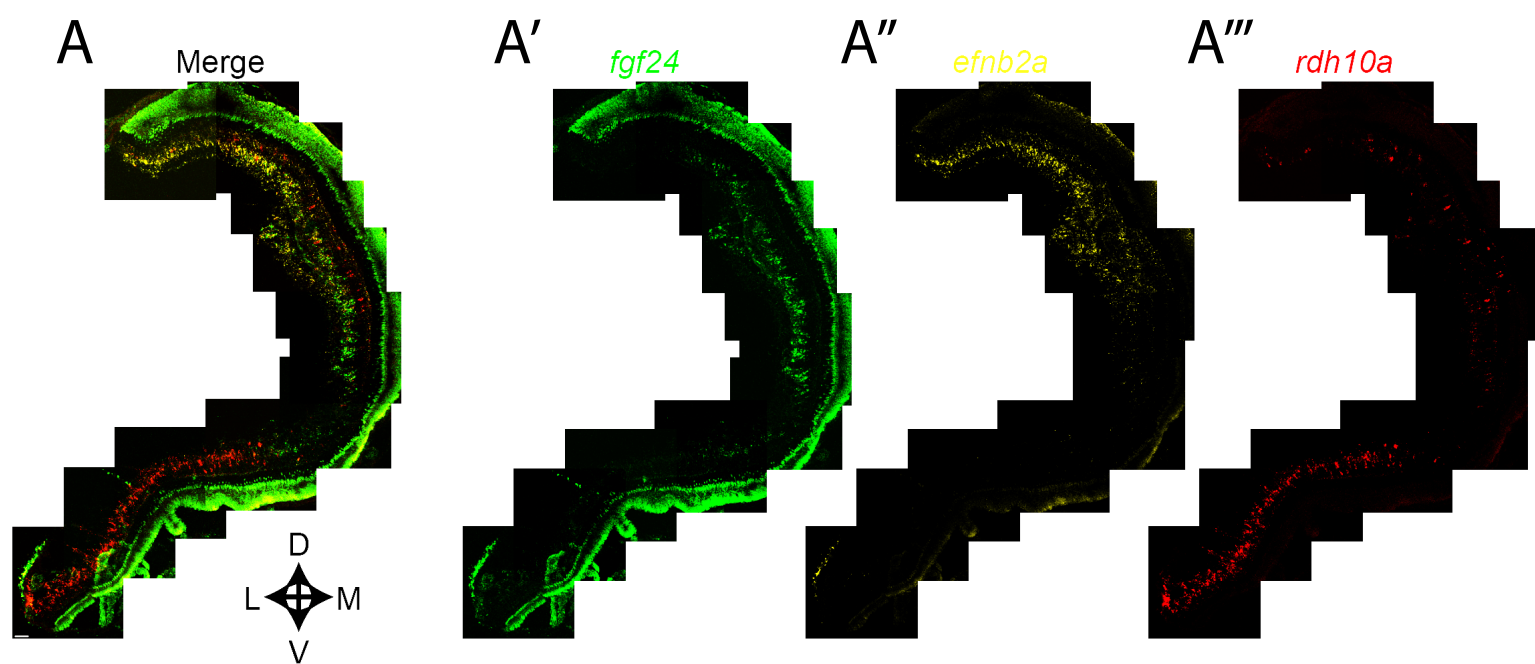

(A) RNAscope in situ hybridization of markers *fgf24* (A'), *efnb2a* (A'') and *rdh10a* (A''') in the 12 month-old zebrafish retina.
