# Supplementary material for: Heterogeneity in quiescent Müller glia in the uninjured zebrafish retina drive differential responses following photoreceptor ablation
Source: PubMed Central journal article supplement (PMC10413128; doi:10.3389/fnmol.2023.1087136), 2023-07-27
Supplement: Image_8.pdf [file Image_8.pdf]

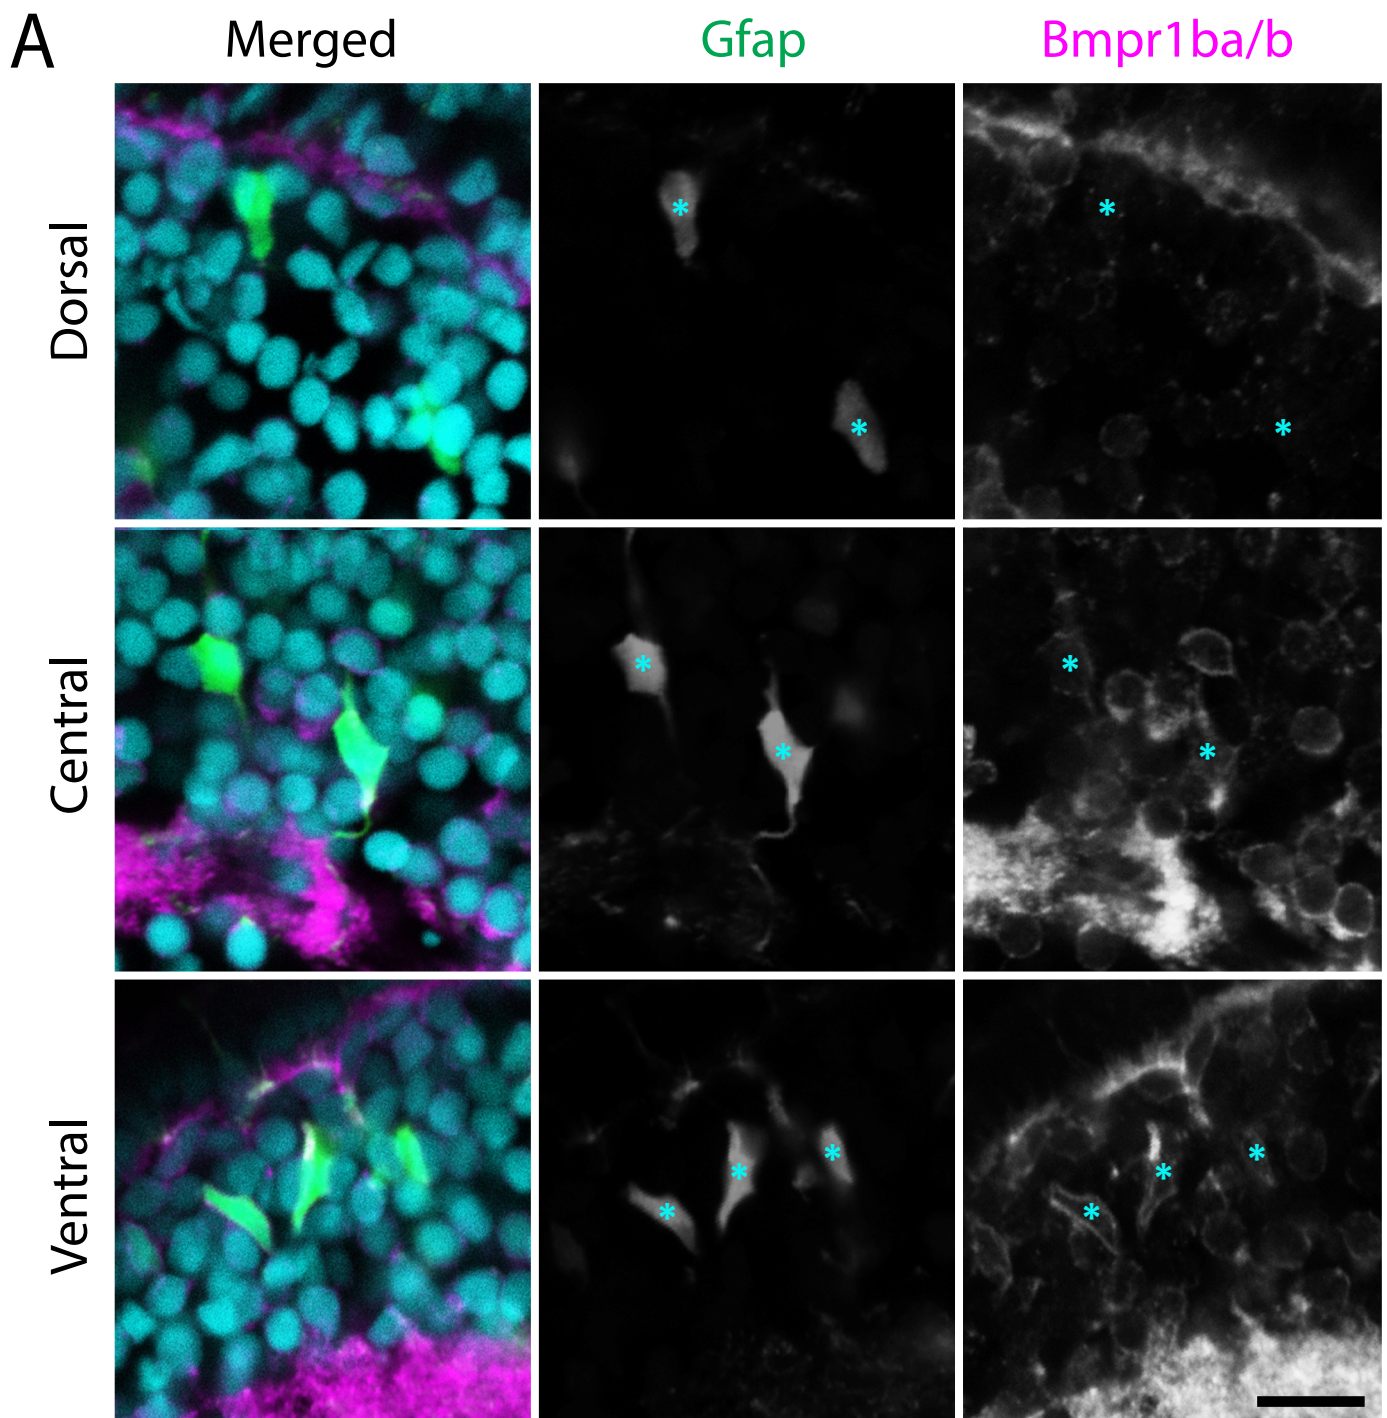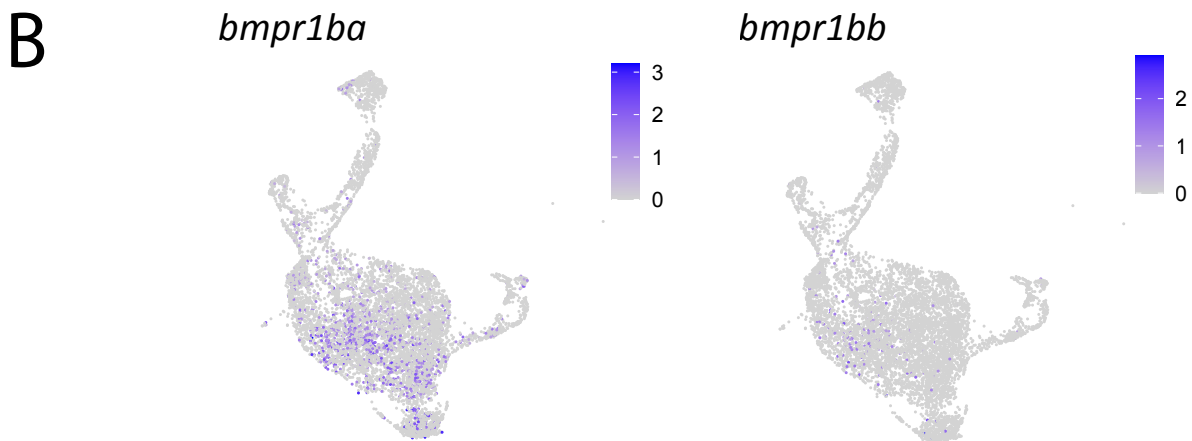

Supplementary Figure 7: (A) Labelling of DAPI-positive nuclei (cyan), Gfap-expressing Müller glia and Bmpr1ba/b. Asterisks indicate cell bodies of Müller glia in dorsal, central and ventral regions of the retina. Scale Bar = 10  $\mu$ m. (B) Expression plots of the Bmpr1ba/b encoding genes.
