# Supplementary material for: Heterogeneity in quiescent Müller glia in the uninjured zebrafish retina drive differential responses following photoreceptor ablation
Source: PubMed Central journal article supplement (PMC10413128; doi:10.3389/fnmol.2023.1087136), 2023-07-27
Supplement: Image_9.pdf [file Image_9.pdf]

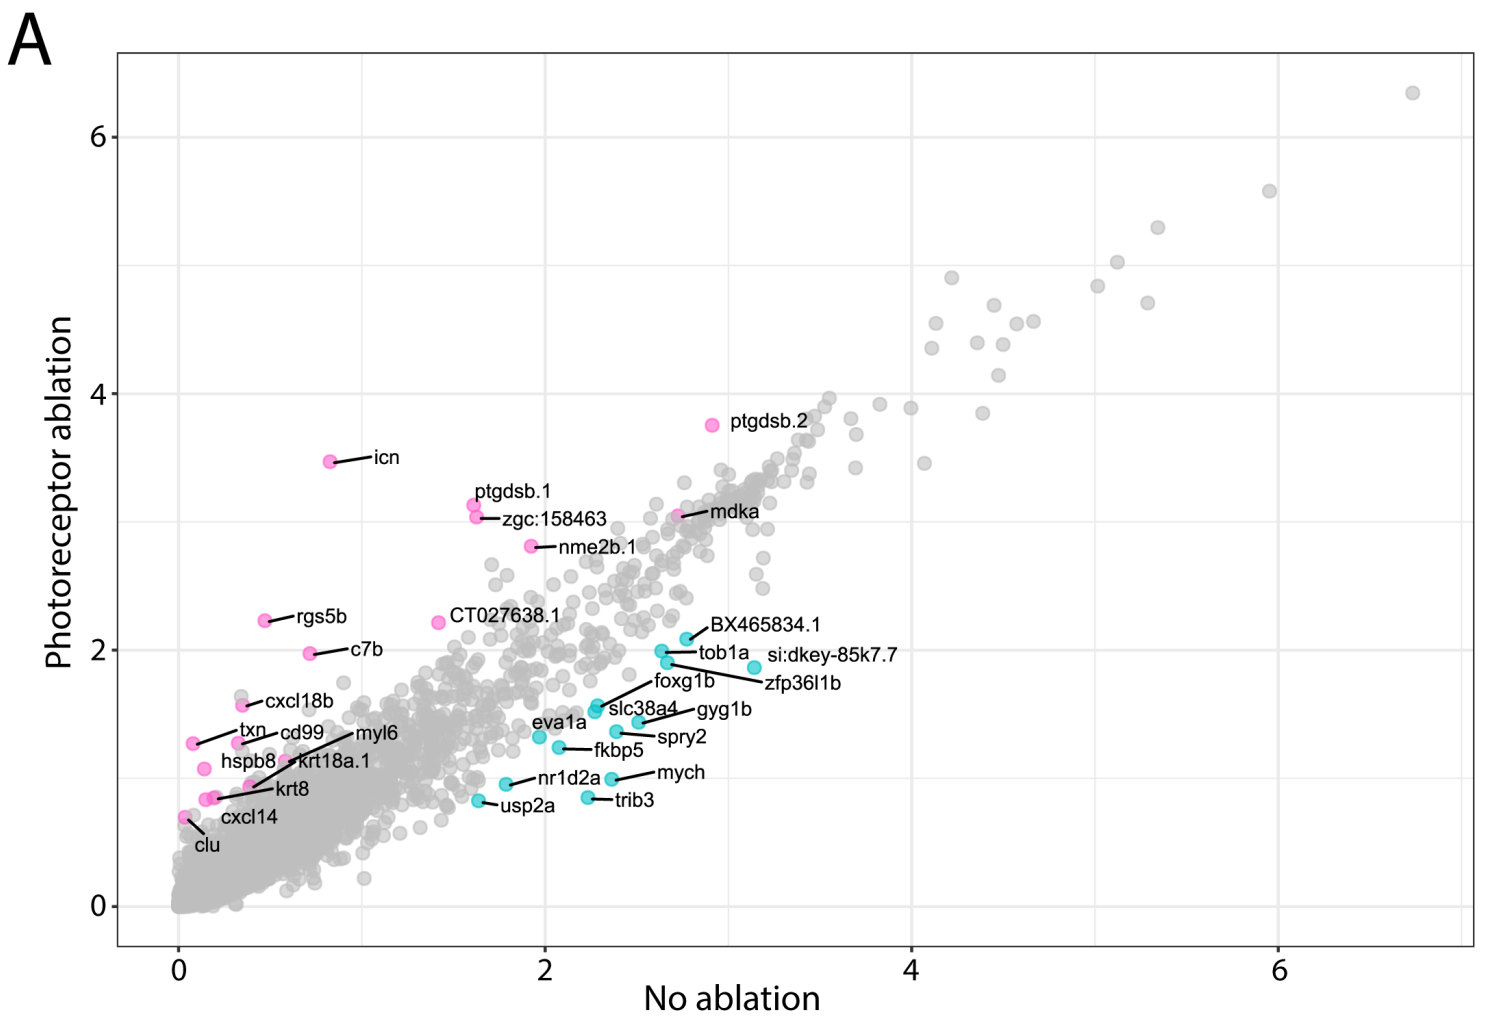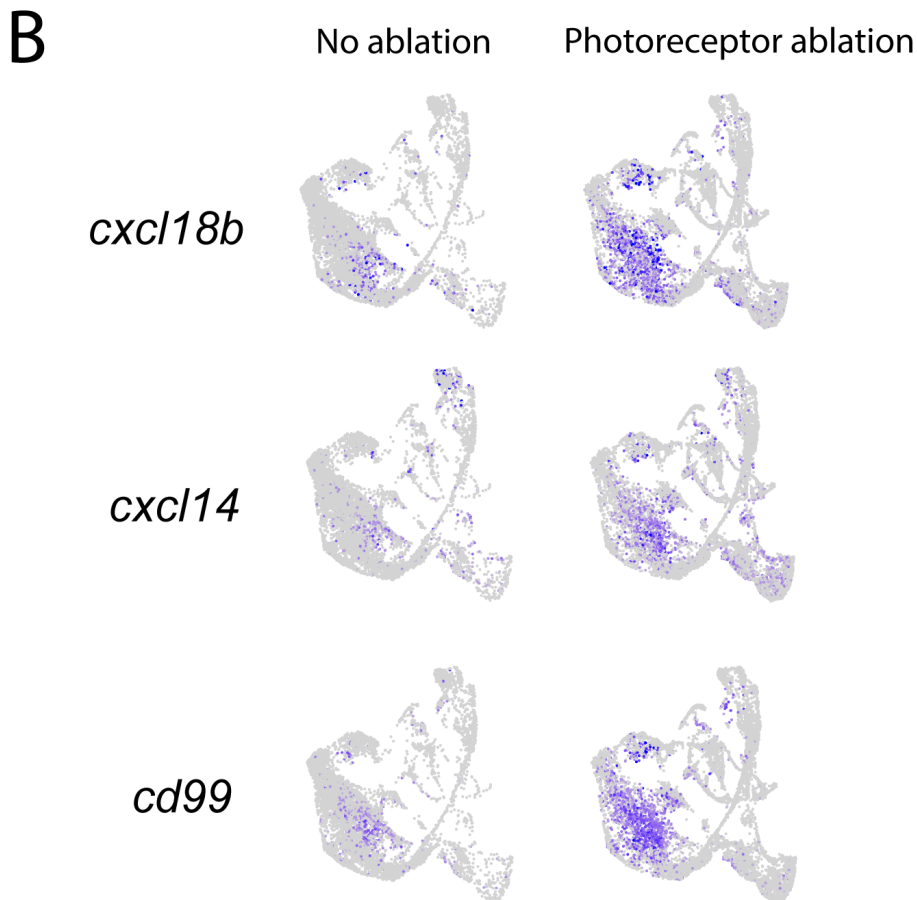

Supplementary Figure 9. (A) Scatterplot indicating genes that are upregulated in resting Müller glia as a result of *Lws2* ablation (photoreceptor ablation; pink) or reduced compared to Müller glia in uninjured (no ablation) retinas (cyan). Gene expression values are presented as  $\log_{1p}$  expression values, averaged from all cells within the four quiescent Müller glia clusters highlighted in Figure 3. (B) Feature expression plots of genes *cxc18b*, *cxc14*, and *cd99*, in Müller glia from the uninjured (no ablation) and *Lws2* ablation (photoreceptor ablation) datasets, split by condition.
